# Supplementary material for: Isolation and characterisation of Leishmania donovani protein antigens from urine of visceral leishmaniasis patients
Source: PubMed Central journal article supplement (PMC7489519; doi:10.1371/journal.pone.0238840), 2020-09-14
Supplement: pone.0238840.s002.pdf [file pone.0238840.s002.pdf]

**S1 Fig. Amino acid sequences of *Leishmania donovani* proteins identified in urine of visceral leishmaniasis patients. Bold, underlined text indicates peptides identified in urine by mass spectrometry. Boxed text indicates predicted epitopes within each protein.**

**Indian VL urine**

**Hypothetical protein (LdBPK\_191140 / XP\_003860289.1)**

MAGLQSEINISINSTRLEPEQSTSDKDICVFCLRRATSSASDPHAPLFFPFLVDCRHYACQPCALVHCDNAGRRIFCPKCHCVSRLAQSGRRRTRSAATAADADADR  
 VSIDDGVSSTRSRRTGTTPHRSALKGKSGTLKRRASSVQFPANPTTSIVPGDGVSVASGAVAVPSEGDSAGEQHHQRRASSPLTQEAVDALPLDPVEARRRRA  
 REQQQLRAAEAAAKAEKAVGLYAITAAPPKVPAPPPSATAASGLATNEGFKVKDRSRSQPVPKLPHTILEPKEEYVPPPLVHTVEEEEHAPAATGESGR  
 DAKPVLPAAGATAAATAEEDVKAESASALAPAWKTSVTPRQMEDEVEAAMAASADKSQTTGVLPPPTGTPEELARPHQLDDCENTEAEEERGVDGLEA  
 HERAALMQRMEEEDTAIRARRGLVVEFDSTPILSQQHQHTLQNHSHHDNTGSLVDFSDQVSVTSDDELSQRASGYKSATRSDSASRRRRRTSVNGASELRA  
 QSHENMAGESDARPEKGGQAAAARTPGDALSSAAKSVAGSGSAEITLSPMTAARQGRVLAASEVDDGGKLIATRAALAEADAK**AKAEAEAA**RAAAEAEAHAE  
 AIRTAEEAR**ALAEQGER**ARQRLQREAVEEAAEQKRQQQRQEEVLRQRQHEERAFAFCQALQDREGLAREALEQAEAAVREHYERGADEWLTAALPHELE  
 AQLRVRAAEERRRQEQQAHLAAEEGLDRDEVEEAEANAWSWLLSGARVDRVVAATEEGDRVQ**EYEELR**FERLQLQREDTAELVHEEAHGRASFIYEAE  
 ATRSLQLSHHAVQRQALAEGERRQVEVLLKKAARREALRQRFQWELDELDAEEVSGRAMLREVEREERTAHVFLQTLASIRRKEVLAQHAAAVAAAAAA  
 DEPGGTSVLSEASTMIAAQVHRRVQQRQTDAAVPLMIEGDGDGVDNTADMVGAATPPQFRPLITAKELAREAREASYAAELQAAALERLREARRVAEEAA  
 IRAQAEQERQAAHAESRQLQEAQRAEQRIREARDAEEQLLQALDLRDEAVRRAEHAAVMQALAEQRAVLEAKLQAAQRQLDEAQQRAQEQVRRAR  
 ADAEMAADAARAAREAQRRDEEWQERCRAEHLRLAEQEREKEEAVRRLAEIEVRAAEAVRLAREEAARTAAEAQERLAEMERRQQAREAEVQSAQRV  
 RSVRDSLREFDSSQSSRYATPFRVAVLPQGRPPPTSSSYRAPSLVAASSTHATHTAGAVATQASVHTPLQTPPLVPSSTSSAVRRQPSAQSPTRVAARVPAAG  
 AAASLAPSDATPPKVISSQHTPLSSAVAPGLGRSGAAVPSSSASAAAGATSLAAMDPAIIRAIRSAVQEIQAQRRTQLQDRAEQNVLSERRVHRRQSDRLR  
 AARDVAAIESSYAASEVDESEERHQRWRASQPHQRTRQRQPVRGYERDSRVASSRMSEERLSVRSRGGDYAQEVSESPWTRSSSSPASRLSPTGAPLSTA  
 PPAPAARSVSSNTLLSTSSVYFDNSYQPSAAAFGAHQHFRNRGCDYAAVQQQQQQQLASAFYSSASRVLFAPRVAHQAREAWAEDGECGYAQRMH  
 AGVGARAYSRVASEQQQRYATGAAQPPRQPLQTVGVAALPSAAHAYNEPEPLPAPAAMEYSPPPRRSTTRAAAEVPPQQSRPAGVGANVGSGGGIA  
 ALPEPSRMCPRCYRTDTPCWRCEGEMICRHCGLPPGSARKLCTAHHRAQLREFTRRKYTESGAATTVGAGKVPSPPPPQQQQQQQQQLRGEQQVQT  
 SFASSAARSHDAAHFADEPARLDVGTSLTSSPMSISPAYRAPEQRQRQQQQAQPHYPSYQAFMAGPAAPSQQPIYSPGYHSAATTYPYAYSH  
 MSQPHQLPTHQLPFYADSERPHMPMPPLDPYVQPFQGPQYAPFGYSVRAATAALGSAATGADFAAPMTVSEAQRQQGTTAVAAEAWATHEVPPESRAA  
 AFGAVARHHASPAELTQSPPPSALPPSQEGASEVMGLRAAEGGAMIETVAPAAAADDTPDAQVQRRPSTSSW**VDDRTHREA**EQTVAENRTPNATVA  
 AAVAGSAAADASLPDSAPEKQGGTTAPVDARSTPDGGAAAENDGDGTSAAATAGATAAAVLEEPKTERKKTFAFFVSLGDGDDAAEPRRPKPTPRNFVPSQL  
 APPTPRKQQRRLTSPGMLLTSQNRSGRQSAHHQHCRKLSPLQAHETNCARNSRKSVSPCRFGGAH**RRQRHTSP**SPYEQVPKASGARDGPRKTPSPHSSK**Q**  
**RQRQHAHA**NGTATSITKSIKSYKLSLPMVVVDESGTPVVYEDVRKVESNPNWMMQQQPQRQGWSSATATPAAHDIYSSGGIRSVGAEE**RNRPESSH**GHSK  
 MGRYYVNVPSQPHDSSPQKHQHQQHQRSSHSDSYYPYFTSSGATSETQSQQPQQQLQHLIAPPQSHIQTIDITYAAPFVDRRVRTLAELEKRLQQLRIVDEYEA  
 AQYHRRQAQRAHQQQQRIHVLLHSPGAVAAGGNTGAFVTAASSWATRELAQPLQRHSSATGRHPQQRVTSPPWRDLNSSPVRPRWDISQPSPIYHPAP  
 ATMTGN

**40S ribosomal protein S9 (LdBPK\_070760 / XP\_003865205.1)**

MPTSSQASAS**SSRRASTTKPGPPPRAS**SAAPPLPARFSPHSQAPLPSATTSRRGSAIPELIGTRRDSSIGATSTNPRLRGGSVIDA AAAAQRSSAPRNPIDFASKESQE  
 AMNRLRLFLPVMRMRVILFRFRSRWKGQPPRQYTPGVSVAAIMSTKSLLDACPQRMVESLAAGATFMSLTPKEIIVYANESHVSCGIVVLLYGLQEERRPEP  
 GGKKNAGGGGGSTRPICTQPHRLHKAMSVLCLMPVMCEDRATSFATRESEADVAIISRWFWEVYTSYMAQASLTADVMTGRTLREVVLPHRRDLLADYF  
 PTSVLLRSWMMWSMLTASDRV**LSRSMEVR**VLSVGDVLFDEGDYCPYIYVRRGALAAIVKGETLAVLEAGAAGVGEESVLFHRRNCRVVAITVELYALHAHH  
 LLRRFLKYPESARRIVAAIERQVWVMEGRTRDVFGLVSILSGVPCLGHTTDAMRDEIARCASVLIIPQGHVVSANTPCTFFCVIGRGSVTLISSMKTAAVAET  
 PSSVNGIDSKGESQLGMRRSSAMKPMNSNPATEMRRESRAGDFFGELCLKPHLWPHYDVMCDSTVSLWQFDREAVLGLVLRNADADAQALEVCRQGIGLYRTQ  
 RGETSIIDGFEPATPNAPANGWRSCIGGQRSRAQSTDFATAPPGARSSSAGSRAGRRLSLSHAAPEWLSRSGSPSEGRTPRGRRRAGVEWTPQWTTYAMT  
 RLQDGLRAEDAKETPPAPSERLGVDEVEKTMNEKVLQVAVQPETPPNPADCDISGDSSELQSIIVGQLFLIMTEKQSRFLRQVKDSNVRLITEDE**GMQLVGE**  
**LNDSLD**DMSGMDALHNSEALVEVTEVMQLEDISASPLEGSHFLPQRAMPVSLVRDSTDATDIYINVHRVDDALSVEGSGGALAGWMPNPNASIGRTRRSTSVGA  
 LGEASVVLGASLNPRSSLNRSFVRPSSAVPPSPRCASGRDFFLSPGAIGVVRPASSEPRMMPARTRPASVDFNQFNKLSVDRSTSMIDRYVKIEDQNYFDS  
 FVKVLPQRDEMWPADGVNTDSEMGTGSMVLLLLHVRKCDYLSAKVMQRCARPVIVKTLGERVLRVTSVMENRTAPRWPIEHSSSIFVRRGTDIVFVSCDAG  
 DECRIVYQASFTASIHENGVEQRTMPLTELSVTGFPAEAEMDADVKSVESVGRMQRSAKKPRMTMTMLAVTANKYKALRQYLETKEKIVDPPGTPESTKL  
 FLQVMSVEGLKHRIEATVTASLYNGATSTVLKTERVIPKTRSPAWPGDTSFVSIISGEGGILFDLHHRDAVIGSTETTVDLIFGGVGLRRLPLLQAQTGRVIGHLV  
 VGVGLGARLGDVSRNRDWWTHLAVEELSLAREGFSINPDPIVLRSGTGAELMRTPLAFAFEASWSMSEASCLLQCPRLCGSTVSYQLEVCDSDEKEVIGRATIL  
 LSDRGLGPGHLDLSDLPPGRGVVRLRSLCLPVLELPARGAAGKASSAAALCPPFSSHLHLSATLHLLHMGCTNLPGGATVELQIDAIGTSLVDAQPYLRTAV  
 QEATTALQWPLSKASVLLRIPSRGDVDDRAAEAVDLRQWQCQGHQCHFAVYDGVVDDVSIQGVAVPLSLLNTALHTYPLFPRCMDADGGG**LDQQPSVGT**  
**TRPRAAAERTLGNLQVFTLLGSLDHQVRGTAEQETD**LLTSLVPAAGGHAPPDQLPYYPNESADITAARLASALPTTVVLSVSNICHVLPASEKYVQIVVRRGATV  
 VLSVERQMGLVSHAESWPTASAVVSCGALPADAALVELVAMDVVEGRSDEEDGITPSAAGAKAESTARDKTRRTITKGNASAAANPLGHAELPVSR**LSV**  
**QAGEVR**VVTMLMSRSQRSSSLETTGRLPRVTPSMCALKDAQVWVPTVSCFICGNRA

## Hypothetical protein (LdBPK\_323250 / XP\_003863736.1)

MRQRTVSRSRARSQIRISAAEEDDLRVGLQRF**LDKLR**QHQLFTEDDVTAISFPPEGSSSSCVGGGSPHSSASTSPRHSPSRADNEEATLDGTFKGGGSSPSMAK  
CRKVPAASPTTTGSPTFASASVIDLDVPLSAPFLTAVNIFEAKLLSKSRVSTDAKLVQRQAYALVWRDPGYLATLMNGDPCLAGSSSTGSSSTTTPDGWSSRRPSSV  
PLASSLSKPHLTCQALFASAPAPTQRPDRRLALQLDECIRLLVYANTSVNLQCSVSTNTRTLALLAFVTCARRLEEEDDVPYGDGPGSVADIVVGNRNHLHAEM  
KKLESLWRSCGIEGRVADYLRECYLVEFLDAALPPAVCSARYDGLQMAVHEKKQRIISDVVASRAGFASMMRMAPLRGLCGLANMSAFGNSKLRARLLDKMA  
SEGVVVERLAAEMAAAAMEAVLAPDTATTTPAHS**STKRPRQSAVYGG****G****SPAHQSRAGASRSASRQG****G**SLDSVSPAGKERRAMTIARASTSLERLLDSOPTPVERIGQ  
CVDILMLLTCPLRPPDGGEESPSRSSTSSASAVVRSTTASRDAALHEICLYLLAICFVSKTHARYAELSSLQLYAADCLMQCAAYSQAFYAMVVHAMDVLDIMI  
ESMSAAPVASAQRTPSSGRASCRLVSPQKNWRKDAEEGDRDSEGRRRVLQHLLPGDEAGLLPLLNLLQYTIHAQANAKSIRRWFGFLADRLLPEVFEAPQL  
TTGRRSSATWGLQQQEQRRRSQADSASRLPGALNGSPAAADGAFDAPVLARDLTRAEVVAAAPYFCFARRAVEETSWRDGTELLFAKVVLLAFHVIVTQG  
HRCNLLFGQACACYDVVAPVLLRSSQ**SDNGASPGSRSPRSSRSSQSS****T****ATYR**STLLMHLREDERASTQAPLHNSNEASEDGGVAGSEERETKGADEEKEVF  
IGSTRRRSLSTRQRQGSVAVKGSAAEAERHLLATKAGEDDQGFSPFIQSPSRSLVVFYACSPSDTEASSDSPLDRRGSRRRRSSSSDRSSDGGRSGLGAALDEAAF  
AAPTASATLAESPEAVTHSWTGRSLRSLSSIGGHSEAPLLDKEKRA

## Protein kinase (LdBPK\_262110 / XP\_003861796.1)

MSNRSLHGGHTTIHNNAYHDAAKEERQLQEQQKPSMPGSHAAVERMTAVQVVDRLRWWRTHRVREQPIVDHFVLRGSYANYSSFGTRPLAPSVTRLLQK  
ARTVRAQYLRTQQQPQHEAPRQSRQVSSLLMAPTAGASVRSASNERLGSADGETERTTGCISEEGQYGERQQRQLREMNDDAKEKVNKRRAAVIASWPRS  
PRPLNEVAIACLGEPAQRDSATDNITRISLSASGSAGTSPPLVRAVSGSAPSVDTPSGALYVPSEQEARVAERLLMLFRPRAASAPLRSRRYRCTAGRLLDATSEFS  
GEPPLQGDWGHAEATGLHHERMTRVSADEITDVRRAPGAAEAVIVLHAPRLVLYEKGLNPKAALRAAGISSDALESDDAAEAESSAELFALRNLPFAFERFFY  
QQQLRGLAETRRSHTPGMRSASADASAESAGVPESDTASAPTGAAGAVAAADTAVDDDIANGDDAFFFSSPLTATLACSLKTVVPLSSVAAAAAPGSRGRD  
GRDAAARQAVQHRGRGRDDGNSRRRGRAALRAVSPALPPVYKGGCPQMTLATHSHHLLSSGARL**QQQQSSNRPS****P**ILSAGLRSSKAPQNGAHLCLRVDD  
LQDVYVFNPVVDMIGKGAFSKYAAVPILRGKEGLRRFASPLLDGQAAPCGSDELSSGSPREGRRVSTVRR**VSPVRRNSSTAL****R**VDPAAGAAVGDAAAGPLTD  
DEAKRRPQAQSLAASLHSPVVALKVIPRKARQKPKAAPDPLATTHSTAAAAAGSVASNAQQAQNDQNSVRRRELVIEIERVLSLHHTGCSQFFFAIRTPDA  
FVIAMRVFPGSMADALFQVSTVQYLHNFGLIHRDIKLENILLSEADAGVDPARIREVGLPALHKS DTSAMMTEIEGGRKGCASATTA  
AETRTRAAQRRYSMLSRNVARLLRVTLIDFGLARRTRASTLSPIVAASRGRGAGAGHSLNATITSPHLSFPPTSASLAASHPHASHNP**NSSYSGLGSPAS****S**SA  
GCAAGVVM**L****ANGGNSSNSY****T**PAKPAPPKPPLLCRPPSAAVG**AGTARLGSS****S**AGISAM**E****RSTPRAGMP****P**SPMPSTANMFTRFLDLEEMDEEENGGAAGTSN  
TTANTTTKVGDLGRGRRDMAENEDDSGAFSTDVSASETDCESEGGSTAEPKEGSAPNGEERLETGPQQEHVARK**ALISPSVLR****A**HPQTPPGSAIIVSPPLPTP  
MLLSSTTAFTLDHFNAENSSSCNTSGPAAGGAGLRNRCASCIYTSHQQLSPAPPVVAAGVSSAPDDTEATLLTPCGTEKYLPEVLSWILEHWARRSTTVGLA  
RAMDLYSIVAYVLLSGCFPFNASSRATLLQQQQRVPRCNSARWTGVSSAAISFVQRLEPNPKRMTAKEALEHPFLHEARQLAEKLSLVPHGEGEEASHPST  
WRDGSMDNHHRSIGGTGRHFEDDANVHARSHWATSTATTNLPHSAPSPHDPHTHSGAAIERASTQPSSSVLAVYDSQRRHAGGPECLEAAANEPSPLS  
SNSGADGGGELLCHHVESGTAPTATSISSGCR**LSDAPRVC****R**SSDECERDDVRAVTRDVPQKVPQLLQVCKESPSTTPPVPTPLAKPCTAALARAASIELPALS  
SLVAHPAKPSPSTLYFTATGTTASADGGRAERATLPEPESAAAGSSAPALAPGSKDAAAANRPVLSLPAATTSTARATEGGEDDLFESLYNNIMSSD

## Sudanese VL urine

### Hypothetical protein (LdBPK\_160110 / XP\_003859699.1)

MPIESAMSEHTDFRGCSSLPDFAAVADVSSERTGVYGLQYSNGAIYEGEWLNGERHGLVCYYPGNIQFVGGQFRSGLMEGPGTMFFATGECFCGFEFRDSTIYKQ  
VYSRQGREICGVWVDGNRVSEMPKKAPEVLQRRARAALFATIEQVNEYLWGAASNPTKLVLSAPPEGAALKAPLDILSSSTDAHGTPKTPPQHLLTVIPTFDAGN  
QSFTS**V****VRFRPNASLADGDAKSSAHGTVTQYGS****P****A**TVFACAAPAPNEIFSVRRFTLRCFVFLFPFLSLPWPVPVAPLRITSLHEER**EFVVS****G****AALRS****D**FDAPSFSMCI  
AVGMLCQIVAILVASRVLGKVQDGKLTPEMVVPCVLLVLLVALVKASYISFFRPHGLERDRLTPKLSALAASLVDKSSVCIYTDGKGVMMNRHYKYR  
WLLFGVVLGLLMSLAPATRGYGHNMFGSNGFQLTAALLAFFATFLFAATLTFVSL**KIDM****Q****REIR****A**KLHVLTNLAFLEERRCLMSPSKHASIAFDLDESFNKNV  
FSGFPGWYLSRLIYASACANHRARTTAMRVFVAFVCAFIVGIADTLLMIQNNRPGDQYYSTAHSYAFFTFLFWGALLHRYLYVCISTRRELQHHLIYMDIAGL  
YHRVKLSDSEAGDIIQCCRCISESNDAEPIFPVVIYCFVFLTVILNLAAMTAICYQLGRAIYR

### Protein kinase (LdBPK\_351070 / XP\_003864692.1)

MTVLPPKINVPATPALDGDVINSYDVNHGKLLGKGGFSEVLAVRHIPSGEIRALKVMMRPSLVGKKAEMVAHEKEILRRTCHPAITLHEAVQTPDKVYFALDLM  
NEDLFEFIVRN**K****TVNEDLS****R**AIMHQLMSGIAYLHEQSIVHRDIKENILINVVVSEANNA**AND****D****S****E****A****T****R****V****E****G****L****Q****V****M****S****D****I****N****S****I****P****L****E****K****L****N****V****E****V****K****I****A****D****F****G****L****A****K****V****V****M****E**  
WDVCSCTPCGTSFYIAPEVIRGIEEQGAKPLCTNQRLVKSDVWSAGVVFVLLCGRPPFHGQVRTGQDRRDLRRIDHGVLFNPNHGWDSISAEAKNLILKMLD  
QESSKR**ITS****D****E****V****L****R****H**PFFTAAGYSRVPASDARRRFMQMQQLSLRTKVPAAQSAEAQVKTMSPLSGP**D****G****Q****K****V****S****S****G****G****S****S****K****G****S****S****N****S****T****G****S****F****L****S****S****K****I****D****F****F****G****H****R****S**  
KHTSDIS**K****E****E****R****Q****R****M****H****A**ELAEQATVIAEEDQEEDVTSYKPSMPVKEAKPARTAVNMKAKVGPDALRK
