# Supplementary material for: Isolation and characterisation of Leishmania donovani protein antigens from urine of visceral leishmaniasis patients
Source: PubMed Central journal article supplement (PMC7489519; doi:10.1371/journal.pone.0238840), 2020-09-14
Supplement: pone.0238840.s003.pdf [file pone.0238840.s003.pdf]

**S1 Table.** Number of *L. donovani* peptides and proteins identified by mass spectrometry of antigens captured from Indian VL urine with anti-1S2D antibody.

| Indian VL urine immuno-captured material |                    | Dish 8 | Dish 35 | Found in both dishes | Total unique |
|------------------------------------------|--------------------|--------|---------|----------------------|--------------|
| Total number of proteins                 |                    | 2      | 3       | 1                    | 4            |
| Total number of peptides                 |                    | 11     | 12      | 4                    | 19           |
| Peptides which:                          | Led to protein IDs | 5      | 6       | 2                    | 9            |
|                                          | Solo peptides      | 6      | 6       | 2                    | 10           |
