# Supplementary material for: Isolation and characterisation of Leishmania donovani protein antigens from urine of visceral leishmaniasis patients
Source: PubMed Central journal article supplement (PMC7489519; doi:10.1371/journal.pone.0238840), 2020-09-14
Supplement: pone.0238840.s004.pdf [file pone.0238840.s004.pdf]

**S2 Table.** Solo peptides of *Leishmania donovani* identified in urine of Indian and Sudanese patients with visceral leishmaniasis.

| Sample         | Experimental origin of peptide | Peptide                | Parent protein                                          | UniProtKB / GenBank accession |
|----------------|--------------------------------|------------------------|---------------------------------------------------------|-------------------------------|
| India VL urine | Dish 8 and 35                  | VTALEENIEAALR          | Hypothetical protein, conserved                         | LdBPK_160420 / XP_003859730.1 |
|                | Dish 8                         | VTLLDR                 | 3-oxoacyl-(acyl-carrier protein) reductase, putative    | LdBPK_242110 / XP_003861301.1 |
|                | Dish 8 and 35                  | LSLEPR                 | Hypothetical protein, conserved                         | LdBPK_354400 / XP_003865018.1 |
|                | Dish 8                         | LVVEEFHFSK             | MP44, putative                                          | LdBPK_270350 / XP_003861892.1 |
|                | Dish 8                         | ESPSPWVR               | Hypothetical protein, conserved                         | LdBPK_281920 / XP_003862291.1 |
|                | Dish 8                         | RVAVVLEGR              | Hypothetical protein, conserved                         | LdBPK_363030 / XP_003865418.1 |
|                | Dish 35                        | SELDARK                | Hypothetical protein, conserved                         | LdBPK_100630 / XP_003858899.1 |
|                | Dish 35                        | ITQLVQLMK              | Hypothetical protein, unknown function                  | LdBPK_312110 / XP_003863299.1 |
|                | Dish 35                        | CFNDDIQGTGAVIAAGFLNAVK | Malic enzyme                                            | LdBPK_240780 / XP_003861168.1 |
|                | Dish 35                        | YDAASQIAILS MER        | Enoyl-CoA hydratase/isomerase family protein, conserved | LdBPK_350360 / XP_003864629.1 |
| Sudan VL urine | VLu                            | AGNVSINQHEGQR          | RNA binding protein, putative                           | LdBPK_190290 / XP_003860208.1 |
|                | VLu/uAg*                       | MEEYLHKS DSAEQR        | Hypothetical protein, conserved                         | LdBPK_220520 / XP_003860802.1 |
|                | VLu/uAg*                       | NSSSR AKADYKPSSSR      | Hypothetical protein, conserved                         | LdBPK_333140 / XP_003864138.1 |
|                | uAg                            | SPASASVEAVGAAAFAR **** | Hypothetical protein, conserved                         | LdBPK_091050 / XP_003858784.1 |

|  |          |                |                                  |                               |
|--|----------|----------------|----------------------------------|-------------------------------|
|  | VLu      | VWTKDLSQMK     | Hypothetical protein, conserved  | LdBPK_353990 / XP_003864977.1 |
|  | uAg      | IAASVPSLR      | Coatomer gamma subunit, putative | LdBPK_282820 / XP_003862380.1 |
|  | VLu/uAg* | NHAKQLYMR      | Protein kinase, putative         | LdBPK_210190 / XP_003860536.1 |
|  | uAg      | GTYEVICR ****  | Hypothetical protein, conserved  | LdBPK_151420 / XP_003859665.1 |
|  | uAg      | QAETALVNR **** | Hypothetical protein, conserved  | LdBPK_303110 / XP_003863022.1 |

\*\*\*\* These peptides were assigned to *L. donovani* proteins from mass spectrometry data after a Mascot search of an *L. donovani*-only database. All other peptides were assigned to *Leishmania* proteins after a simultaneous *L. donovani* and human database search. However, these indicated peptides had very high homology to *Leishmania* proteins in subsequent homology searches and were therefore retained.

\*Some gel fragments analysed by mass spectrometry spanned two sample types.
