# Supplementary material for: Isolation and characterisation of Leishmania donovani protein antigens from urine of visceral leishmaniasis patients
Source: PubMed Central journal article supplement (PMC7489519; doi:10.1371/journal.pone.0238840), 2020-09-14
Supplement: pone.0238840.s005.pdf [file pone.0238840.s005.pdf]

**S3 Table.** Number of epitope peptides of  $\geq 8$  amino acids in *Leishmania donovani* proteins identified from VL patients' urine.

| VL urine origin and method used        | Protein name (UniProtKB accession)      | Number of predicted epitopes (length range in amino acids) at two epitope cut-off scores |               | Number of N-linked glycosylation sites |
|----------------------------------------|-----------------------------------------|------------------------------------------------------------------------------------------|---------------|----------------------------------------|
|                                        |                                         | 0.65                                                                                     | 0.55          |                                        |
| India (immunopanning)                  | Hypothetical protein (LdBPK_191140)     | 6 (8-10 aa)                                                                              | 48 (8-86 aa)  | 1                                      |
|                                        | 40S ribosomal protein S9 (LdBPK_070760) | 4 (8-17 aa)                                                                              | 25 (8-142 aa) | 0                                      |
|                                        | Hypothetical protein (LdBPK_323250)     | 8 (8-24 aa)                                                                              | 18 (8-64 aa)  | 1                                      |
|                                        | Protein kinase (LdBPK_262110)           | 12 (8-14 aa)                                                                             | 23 (9-284 aa) | 3                                      |
| Sudan (immunocapture and western blot) | Hypothetical protein ‡ (LdBPK_160110)   | 0                                                                                        | 1 (29 aa)     | 0                                      |
|                                        | Protein kinase (LdBPK_351070)           | 3 (9-25 aa)                                                                              | 4 (15-149 aa) | 1                                      |
| Total                                  |                                         | 33                                                                                       | 119           | 4 proteins                             |

‡ The lower epitope score threshold was used for this protein due to absence of epitopes  $>8$  aa at the higher score threshold.
